# Supplementary material for: Influence of 1,3-diacylglycerol on physicochemical and digestion properties of nanoemulsions and its enhancement of encapsulation and bioaccessibility of hydrophobic nobiletin
Source: Royal Society of Chemistry journal article supplement (doi:10.1039/d3fo00543g), 2023-01-01
Supplement: d3fo00543g1.pdf [file d3fo00543g1.pdf]

Supplementary figure

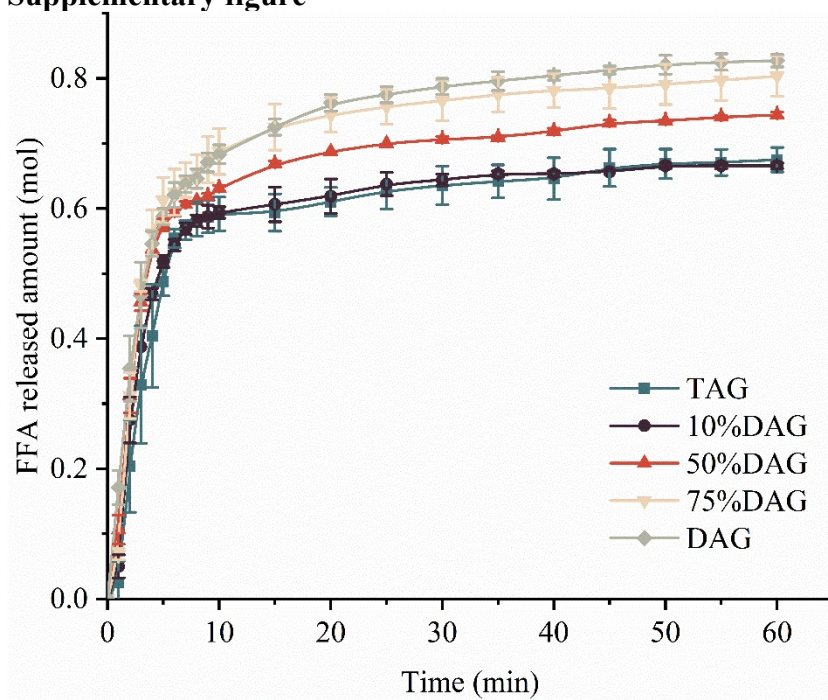

Fig. S1 Fatty acid released amount of low-loading NOB nanoemulsions (0.24 mg/g) *in vitro* digestion.
